# Supplementary material for: Bacterial translocation aggravates CCl4-induced liver cirrhosis by regulating CD4+ T cells in rats
Source: PubMed Central journal article supplement (PMC5278361; doi:10.1038/srep40516), 2017-01-30
Supplement: srep40516-s1.pdf [file srep40516-s1.pdf]

**Bacterial translocation aggravates CCl<sub>4</sub>-induced liver cirrhosis by regulating CD4<sup>+</sup> T cells in rats**

Haiyan Shi<sup>1,2#</sup>, Longxian Lv<sup>1,2#</sup>, Hongcui Cao<sup>1,2</sup>, Haifeng Lu<sup>1,2</sup>, Ning Zhou<sup>1,2</sup>, Jiezuan Yang<sup>1,2</sup>,  
Haiyin Jiang<sup>1,2</sup>, Huihui Dong, Xinjun Hu<sup>1,2</sup>, Wei Yu<sup>1,2</sup>, Xiawei Jiang<sup>1,2</sup>, Beiwen Zheng<sup>1,2</sup>, Lanjuan  
Li<sup>1,2\*</sup>

## Supplementary figure 1

Supplementary Figure 1

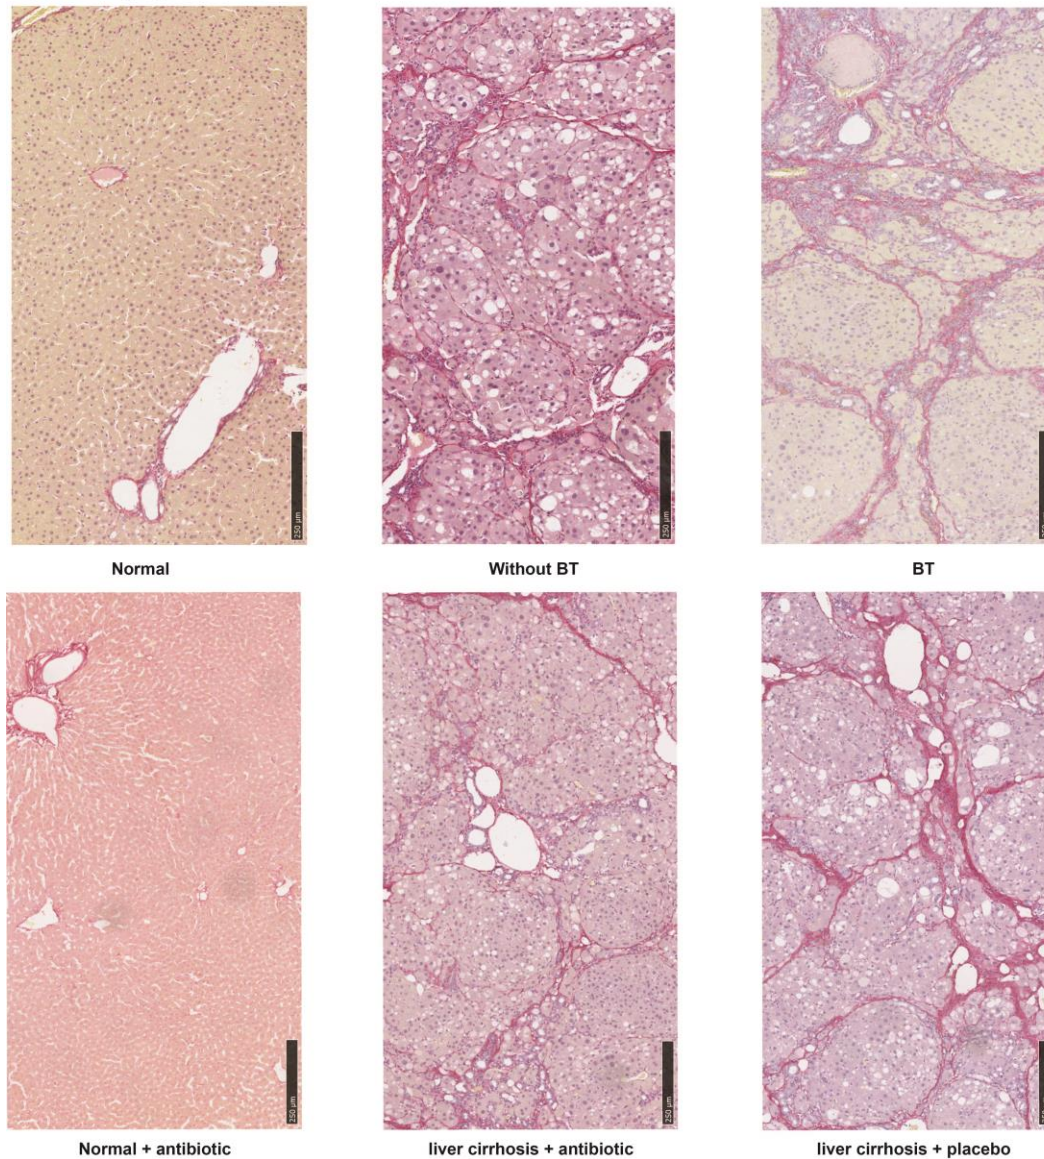

*Supplementary Figure 1.* BT aggravates the  $\text{CCl}_4$ - induced liver injury. To visualize collagen deposition, the formalin-fixed, paraffin-embedded liver samples were stained with Sirius Red. Histological examinations and representative images were taken using a NanoZoomer 2.0 RS optical microscope.
